# Supplementary material
Source: PubMed Central journal article supplement (PMC10350838)
Supplement: EMBJ-42-e112817-s005.pdf [file EMBJ-42-e112817-s005.pdf]

# Appendix

To the article entitled

## Host cell egress of *Brucella abortus* requires BNIP3L-mediated mitophagy

Jérémy Verbeke<sup>1</sup>, Youri Fayt<sup>1</sup>, Lisa Martin<sup>1</sup>, Oya Yilmaz<sup>1</sup>, Jaroslaw Sedzicki<sup>4</sup>, Angeline Reboul<sup>2</sup>, Michel Jadot<sup>3</sup>, Patricia Renard<sup>1</sup>, Christoph Dehio<sup>4</sup>, Henri-François Renard<sup>1</sup>, Jean-Jacques Letesson<sup>2</sup>, Xavier De Bolle<sup>2\*</sup>, Thierry Arnould<sup>1\*#</sup>

1. Research Unit in Cell Biology (URBC) – Namur Research Institute for Life Sciences (NARILIS), University of Namur, 5000 Namur, Belgium.
2. Research Unit in Microorganisms Biology (URBM) – Namur Research Institute for Life Sciences (NARILIS), University of Namur, 5000 Namur, Belgium.
3. Research Unit in Molecular Physiology (URPhyM) – Namur Research Institute for Life Sciences (NARILIS), University of Namur, 5000 Namur, Belgium.
4. Biozentrum, University of Basel, 4056 Basel, Switzerland

\*Co-last senior authors

#Corresponding author: [thierry.arnould@unamur.be](mailto:thierry.arnould@unamur.be)

## Table of contents

|                          |   |
|--------------------------|---|
| Appendix Figure S1 ..... | 2 |
| Appendix Figure S2 ..... | 3 |
| Appendix Figure S3 ..... | 4 |
| Appendix Figure S4 ..... | 5 |

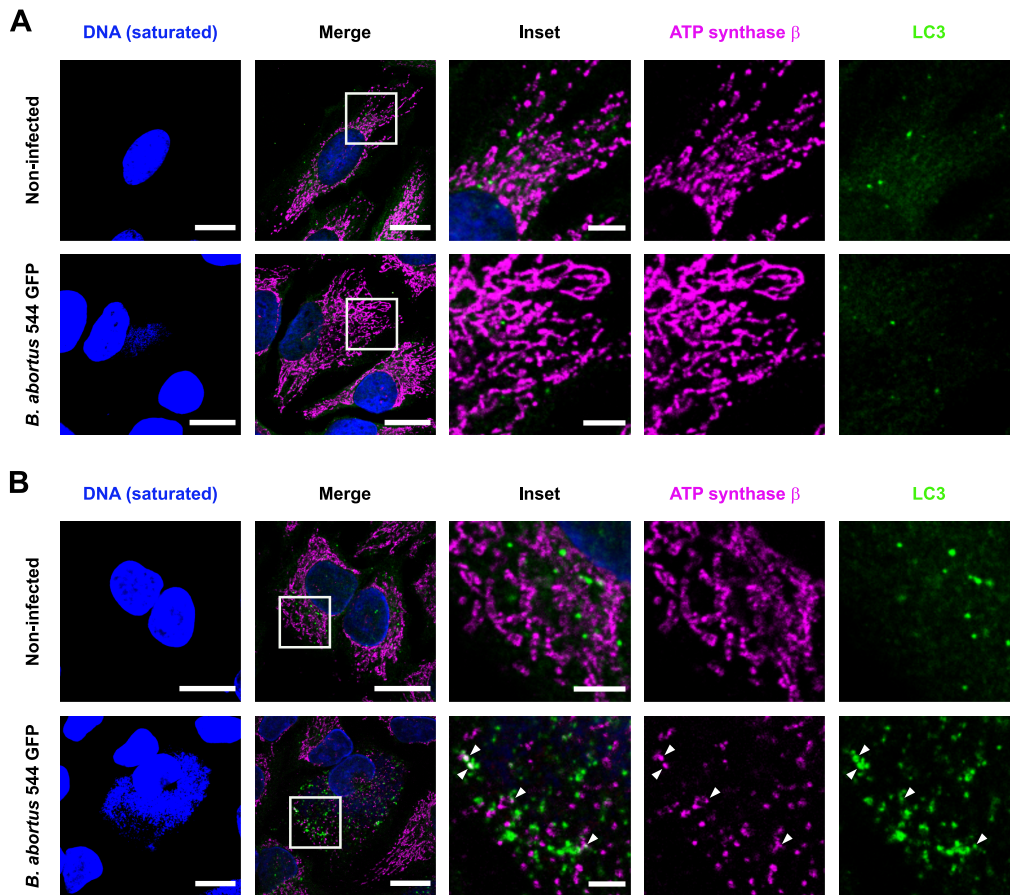

**Appendix Figure S1. Kinetics of mitophagy triggered by *B. abortus* in HeLa cells at 24 and 72 h pi.**

A., B. Representative confocal micrographs of HeLa cells infected or not with *B. abortus* 544 GFP for 24 h (A.) and 72 h (B.), then fixed and immunostained for the  $\beta$ -subunit of the ATP synthase (Alexa Fluor 633 – Magenta) and LC3 (Alexa Fluor 568 – Green). DNA was stained with Hoechst 33258 (Blue). The Hoechst intensity was intentionally shown with overexposed signals to visualise bacterial DNA and confirm the infected cells status. Scale bars: 20  $\mu$ m. Inset scale bars: 5  $\mu$ m.

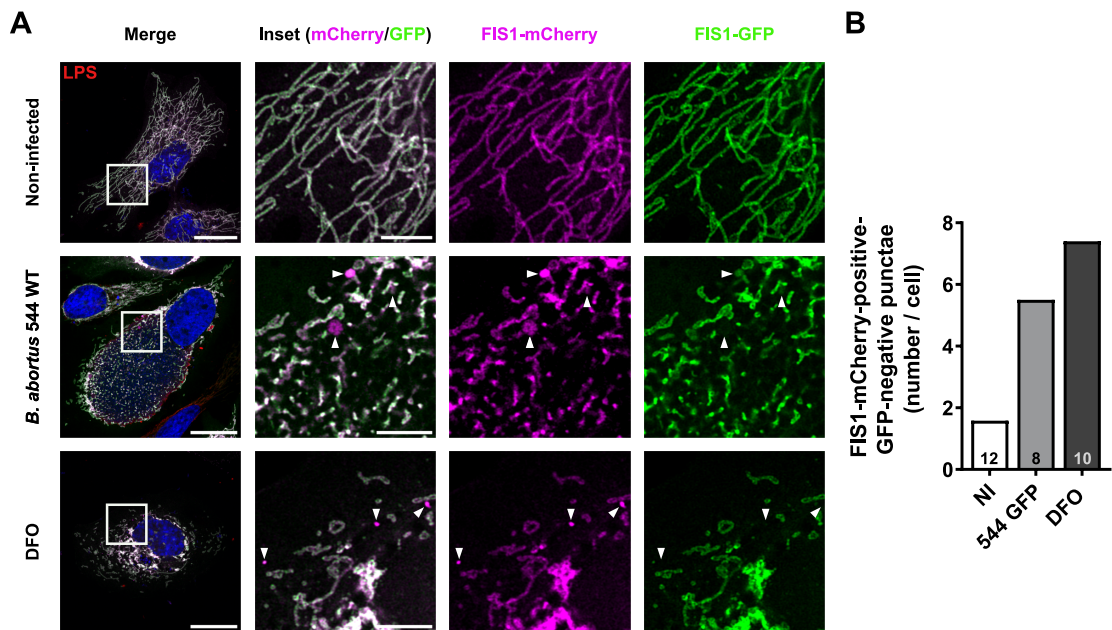

**Appendix Figure S2. The magnitude of mitophagy induced by *B. abortus* is similar to the mitophagy induced by DFO.**

A. Representative confocal micrographs of HeLa cells transfected with a FIS1-GFP(Green)-mCherry(Magenta) expression construct, infected or not with *B. abortus* 544 for 48 h, then fixed and immunostained for *B. abortus* LPS (Alexa Fluor 633 – Red). A treatment of DFO (150  $\mu$ M) for 48 h was used as a positive control. DNA was stained with Hoechst 33258 (Blue). Arrows indicate FIS1-mCherry-positive-GFP-negative punctae. Scale bars: 20  $\mu$ m. Inset scale bars: 5  $\mu$ m.

B. Quantification of the number of FIS1-mCherry-positive-GFP-negative punctae per HeLa cell in the indicated conditions from micrographs shown in (A). Data are presented as means from n=1 experiment (the numbers indicated in the columns represent the number of cells analysed per condition).

**A**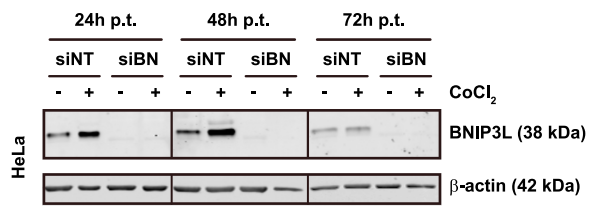**B**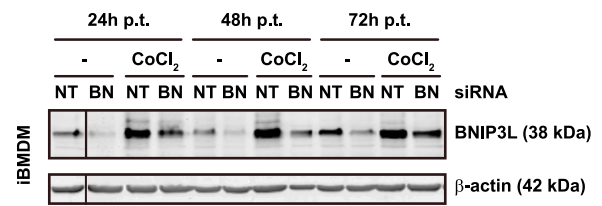

### Appendix Figure S3. BNIP3L depletion efficiency in HeLa cells and iBMDM using a siRNA SMARTpool approach.

Western-blot analysis of BNIP3L abundance in HeLa cells (A) and iBMDM (B) transfected with a non-targeting siRNA pool (siINT – 40 nM) or a BNIP3L siRNA SMARTpool (siBNIP3L – 40 nM) for 24 h, then left for the indicated times post-transfection (p.t.) and treated (+) or not (-) with 100  $\mu$ M CoCl<sub>2</sub> for 16 h before analysis. The abundance of  $\beta$ -actin was used as a loading control. Black bars indicate a crop in the membrane.



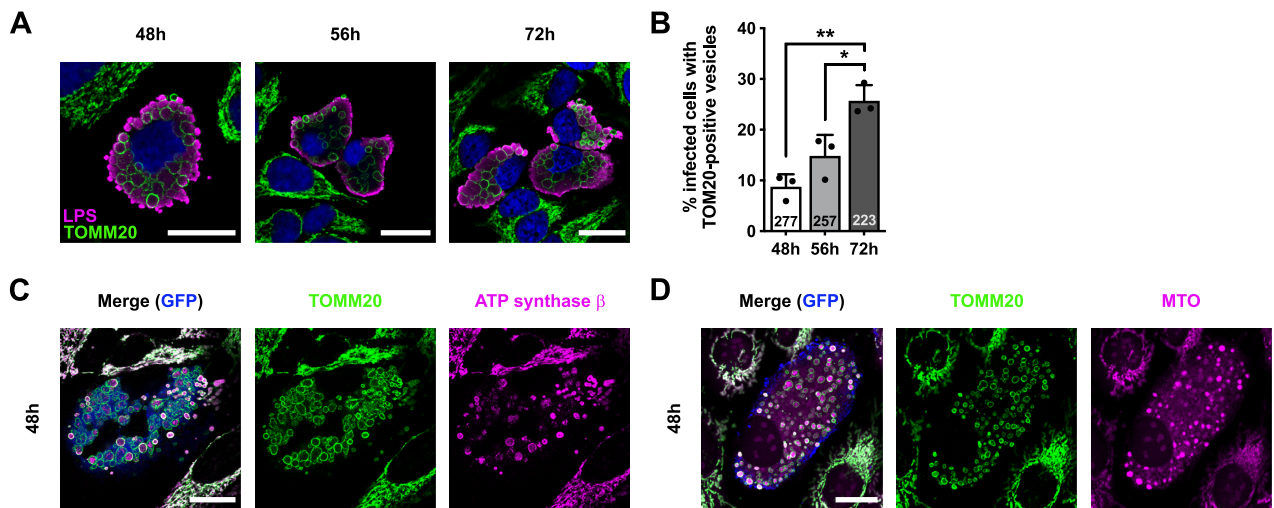

**Appendix Figure S4. *B. abortus* infection induces the swelling of mitochondria in a fraction of HeLa cells at 72 h pi.**

A. Representative confocal micrographs of HeLa cells infected or not with *B. abortus* 544 for the indicated times, then fixed and immunostained for TOMM20 (Alexa Fluor 488 – Green) and *B. abortus* LPS (Alexa Fluor 568 – Magenta). DNA was stained with Hoechst 33258 (Blue). Scale bars: 20  $\mu$ m.

B. Quantification of the percentage of infected HeLa cells displaying TOMM20-positive enlarged vesicles at the indicated times, from micrographs shown in (A). Data are presented as means  $\pm$  SD from n=3 (biological replicates) independent experiments (the numbers indicated in the columns represent the number of cells analysed per condition); Statistical analyses were performed using a one-way ANOVA followed by a Tukey's multiple comparisons test; \*:  $p < 0.05$ ; \*\*:  $p < 0.01$ .

C. Representative confocal micrographs of HeLa cells infected or not with *B. abortus* 544 GFP (Blue) for 48 h, then fixed and immunostained for TOMM20 (Alexa Fluor 647 – Green) and the  $\beta$ -subunit of the ATP synthase (Alexa Fluor 568 – Magenta). Scale bars: 20  $\mu$ m.

D. Representative confocal micrographs of HeLa cells infected or not with *B. abortus* 544 GFP (Blue) for 48 h, stained with 100 nM of MitoTracker™ Orange (MTO) fluorescent probe (Magenta) for 30 min before analysis, then fixed and immunostained for TOMM20 (Alexa Fluor 647 – Green). Scale bars: 20  $\mu$ m.
